# Supplementary material for: High-Throughput Sequencing Reveals Transcriptome Signature of Early Liver Development in Goat Kids
Source: MDPI journal article supplement (doi:10.3390/genes13050833), 2022-05-06
Supplement: s1 [file s1]

**Table S1** Reads of the 25 Libraries.

| Sample | Raw Reads | Clean     |                |        |        |                |
|--------|-----------|-----------|----------------|--------|--------|----------------|
|        |           | Reads     | Error rate (%) | Q20(%) | Q30(%) | GC content (%) |
| D1_1   | 124706552 | 122652950 | 0.0259         | 97.73  | 93.26  | 50.11          |
| D1_2   | 124711436 | 121783280 | 0.0261         | 97.57  | 93.06  | 51.29          |
| D1_3   | 121605834 | 119676092 | 0.0259         | 97.65  | 93.25  | 50.11          |
| D1_4   | 125007672 | 120264076 | 0.0262         | 97.55  | 93     | 50.57          |
| D1_5   | 123313310 | 120479764 | 0.0258         | 97.73  | 93.39  | 51.17          |
| W2_1   | 123078860 | 120859436 | 0.0258         | 97.72  | 93.4   | 51.45          |
| W2_2   | 125724416 | 123705754 | 0.0258         | 97.73  | 93.39  | 50.39          |
| W2_3   | 120567842 | 118304356 | 0.026          | 97.62  | 93.13  | 50.06          |
| W2_4   | 162766876 | 136724132 | 0.0259         | 97.7   | 93.25  | 50.87          |
| W2_5   | 124667212 | 122445796 | 0.0261         | 97.6   | 93.12  | 50.47          |
| W4_1   | 122695698 | 120410174 | 0.0262         | 97.51  | 92.98  | 50.46          |
| W4_2   | 119138166 | 117388094 | 0.026          | 97.63  | 93.16  | 50.82          |
| W4_3   | 122019306 | 120185204 | 0.0261         | 97.58  | 93.09  | 50.54          |
| W4_4   | 124607136 | 123101152 | 0.0256         | 97.81  | 93.54  | 51.05          |
| W4_5   | 125188728 | 123580984 | 0.0257         | 97.76  | 93.39  | 50.59          |
| W8_1   | 124239242 | 121955756 | 0.0254         | 97.86  | 93.7   | 50.97          |
| W8_2   | 120650752 | 119109088 | 0.0256         | 97.83  | 93.55  | 50.84          |
| W8_3   | 117802766 | 115449396 | 0.0258         | 97.76  | 93.38  | 50.21          |

|       |           |           |        |       |       |       |
|-------|-----------|-----------|--------|-------|-------|-------|
| W8_4  | 121776430 | 119620226 | 0.0258 | 97.74 | 93.34 | 50.8  |
| W8_5  | 125408616 | 120674068 | 0.0259 | 97.69 | 93.25 | 50.94 |
| W12_1 | 120588066 | 119033274 | 0.0256 | 97.81 | 93.55 | 51.73 |
| W12_2 | 122109328 | 119799184 | 0.0267 | 97.43 | 92.52 | 51.05 |
| W12_3 | 122277196 | 119656710 | 0.0257 | 97.78 | 93.46 | 50.12 |
| W12_4 | 117731312 | 114642794 | 0.0257 | 97.77 | 93.44 | 51    |
| W12_5 | 124226524 | 122363858 | 0.0258 | 97.75 | 93.33 | 50.09 |

---
