# Supplementary material for: High-Throughput Sequencing Reveals Transcriptome Signature of Early Liver Development in Goat Kids
Source: MDPI journal article supplement (doi:10.3390/genes13050833), 2022-05-06
Supplement: s1 [file s1]

**Table S3** Statistics of known and new transcripts in each group

| Sample Name | Known mRNA<br>Num | Novel mRNA Num | All mRNA<br>Num |
|-------------|-------------------|----------------|-----------------|
| D1_1        | 19480             | 7090           | 26570           |
| D1_2        | 19620             | 7091           | 26711           |
| D1_3        | 19620             | 7070           | 26690           |
| D1_4        | 19239             | 7075           | 26314           |
| D1_5        | 19107             | 7041           | 26148           |
| W2_1        | 19335             | 7089           | 26424           |
| W2_2        | 19377             | 7067           | 26444           |
| W2_3        | 18800             | 7060           | 25860           |
| W2_4        | 19430             | 7062           | 26492           |
| W2_5        | 19379             | 7067           | 26446           |
| W4_1        | 19278             | 7104           | 26382           |
| W4_2        | 19501             | 7093           | 26594           |
| W4_3        | 19462             | 7096           | 26558           |
| W4_4        | 19496             | 7101           | 26597           |
| W4_5        | 19519             | 7093           | 26612           |
| W8_1        | 18778             | 7029           | 25807           |
| W8_2        | 19228             | 7091           | 26319           |
| W8_3        | 19235             | 7049           | 26284           |

|       |       |      |       |
|-------|-------|------|-------|
| W8_4  | 18830 | 7062 | 25892 |
| W8_5  | 19342 | 7078 | 26420 |
| W12_1 | 19438 | 7062 | 26500 |
| W12_2 | 19102 | 7066 | 26168 |
| W12_3 | 19322 | 7084 | 26406 |
| W12_4 | 18927 | 7071 | 25998 |
| W12_5 | 19079 | 7085 | 26164 |

---
