# Supplementary material for: High-Throughput Sequencing Reveals Transcriptome Signature of Early Liver Development in Goat Kids
Source: MDPI journal article supplement (doi:10.3390/genes13050833), 2022-05-06
Supplement: s1 [file s1]

**Table S2.** Summary of sequencing read alignment to the goat reference genome.

| Sample | Total reads | Total mapped      | Multiple mapped  | Unique mapped     |
|--------|-------------|-------------------|------------------|-------------------|
| D1_1   | 122652950   | 119526217(97.45%) | 11359329(9.26%)  | 108166888(88.19%) |
| D1_2   | 121783280   | 118365352(97.19%) | 11693696(9.6%)   | 106671656(87.59%) |
| D1_3   | 119676092   | 116299281(97.18%) | 11002117(9.19%)  | 105297164(87.99%) |
| D1_4   | 120264076   | 117157837(97.42%) | 12697214(10.56%) | 104460623(86.86%) |
| D1_5   | 120479764   | 117342955(97.4%)  | 12589812(10.45%) | 104753143(86.95%) |
| W2_1   | 120859436   | 117162548(96.94%) | 12277063(10.16%) | 104885485(86.78%) |
| W2_2   | 123705754   | 120370171(97.3%)  | 12269044(9.92%)  | 108101127(87.39%) |
| W2_3   | 118304356   | 115202551(97.38%) | 12025689(10.17%) | 103176862(87.21%) |
| W2_4   | 136724132   | 132755116(97.1%)  | 15714255(11.49%) | 117040861(85.6%)  |
| W2_5   | 122445796   | 119027235(97.21%) | 12710898(10.38%) | 106316337(86.83%) |
| W4_1   | 120410174   | 116902441(97.09%) | 11231241(9.33%)  | 105671200(87.76%) |
| W4_2   | 117388094   | 114165989(97.26%) | 10431646(8.89%)  | 103734343(88.37%) |
| W4_3   | 120185204   | 116771445(97.16%) | 12150598(10.11%) | 104620847(87.05%) |
| W4_4   | 123101152   | 119636922(97.19%) | 12345381(10.03%) | 107291541(87.16%) |
| W4_5   | 123580984   | 120356723(97.39%) | 12473458(10.09%) | 107883265(87.3%)  |
| W8_1   | 121955756   | 118574248(97.23%) | 13868028(11.37%) | 104706220(85.86%) |
| W8_2   | 119109088   | 116160798(97.52%) | 13173902(11.06%) | 102986896(86.46%) |
| W8_3   | 115449396   | 112576636(97.51%) | 12046959(10.43%) | 100529677(87.08%) |
| W8_4   | 119620226   | 116392152(97.3%)  | 13430024(11.23%) | 102962128(86.07%) |

|              |           |                   |                  |                   |
|--------------|-----------|-------------------|------------------|-------------------|
| <b>W8_5</b>  | 120674068 | 117566378(97.42%) | 12965052(10.74%) | 104601326(86.68%) |
| <b>W12_1</b> | 119033274 | 115840121(97.32%) | 13042473(10.96%) | 102797648(86.36%) |
| <b>W12_2</b> | 119799184 | 116198233(96.99%) | 11636839(9.71%)  | 104561394(87.28%) |
| <b>W12_3</b> | 119656710 | 116673515(97.51%) | 10534177(8.8%)   | 106139338(88.7%)  |
| <b>W12_4</b> | 114642794 | 111662013(97.4%)  | 11230955(9.8%)   | 100431058(87.6%)  |
| <b>W12_5</b> | 122363858 | 119161730(97.38%) | 10878213(8.89%)  | 108283517(88.49%) |

---
